# Supplementary material
Source: publisher figshare collection journal article supplement (https://karger.figshare.com/ndownloader/files/25290680)
Supplement: Supplementary file 1 [file 25290680]

Supplementary Table 1. Mean (SD) values of arterial pHa, PaCO2, PaO2, BE, blood glucose and lactate before, at the end of (0 h) and 1, 3, 6, 12 and 24 h after hypoxic-ischaemic insult in the three groups

| Parameters | Group | Baseline | 0 | 1 | 3 | 6 | 12 | 24 |
| --- | --- | --- | --- | --- | --- | --- | --- | --- |
| pHa | NT | 7.42 (0.05) | 6.85 (0.10) | 7.30 (0.06) | 7.48 (0.03) | 7.46 (0.05) | 7.46 (0.05) | 7.50 (0.06) |
| TH | 7.42 (0.11) | 6.79 (0.11) | 7.22 (0.12) | 7.42 (0.10) | 7.44 (0.05) | 7.44 (0.06) | 7.42 (0.03) |
| TH+EV | 7.45 (0.07) | 6.85 (0.12) | 7.20 (0.06)* | 7.40 (0.08) | 7.39 (0.04) | 7.45 (0.08) | 7.44 (0.06) |
| PaCO2 (mmHg) | NT | 46.9 (4.9) | 34.5 (11.3) | 42.2 (6.6) | 42.5 (4.14) | 47.5 (6.4) | 45.1 (5.0) | 39.3 (3.3) |
| TH | 43.3 (12.5) | 42.5 (12.9)## | 42.2 (8.7) | 41.5 (8.0) | 42.2 (8.0) | 41.1 (7.7) | 37.4 (5.5) |
| TH+EV | 40.1 (6.4) | 29.5 (8.6) | 44.2 (5.3) | 41.0 (8.0) | 42.2 (7.4) | 40.0 (5.8) | 37.6 (6.0) |
| PaO2 (mmHg) | NT | 89.6 (11.5) | 21.0 (11.9) | 94.5 (28.4) | 88.0 (18.1) | 89.2 (10.0) | 85.8 (15.2) | 89.7 (15.1) |
| TH | 99.4 (15.4) | 19.3 (7.2) | 110.3 (20.5) | 81.4 (21.2) | 81.7 (25.3) | 81.2 (25.7) | 78.6 (22.0) |
| TH+EV | 96.8 (22.8) | 20.2 (5.8) | 108.1 (22.8) | 86.0 (14.8) | 81.5 (13.4) | 99.4 (20.7) | 110.5 (34.4) ** |
| BE (mmol/mL) | NT | 5.8 (2.4) | −26.0 (5.0) | −5.5 (3.9) | 7.8 (1.6) | 8.6 (1.6) | 7.2 (3.4) | 6.8 (2.7) |
| TH | 2.9 (3.5) | −27.6 (3.5) | −10.0 (4.9)* | 1.8 (4.2)** | 4.2 (3.2)* | 3.2 (3.4) | 0.7 (3.9)*** |
| TH+EV | 4.2 (3.1) | −26.0(2.4) | −10.1 (2.9)* | 2.6 (3.1)* | 4.6 (2.5)* | 3.5 (3.3) | 1.0 (4.2)* |
| Blood glucose (mg/dL) | NT | 146.0 (19.4) | 253.5 (73.2) | 237.0 (57.0) | 218.1 (65.7) | 183.9 (56.8) | 195.5 (72.6) | 115.6 (40.1) |
| TH | 152.4 (42.3) | 226.6 (112.1) | 259.4 (75.1) | 261.0(64.9) | 229.0 (71.4) | 236.4 (66.2) | 196.3 (53.4) |
| TH+EV | 159.3 (34.7) | 296.8 (82.0) | 294.5 (76.9) | 311.8 (85.7)* | 298.0 (55.4)** | 293.3 (85.9)* | 186.2 (58.3) |
| Lactate (mg/dL) | NT | 18.0 (4.4) | 227.1 (28.0) | 122.5 (30.3) | 37.5 (11.6) | 27.8 (9.9) | 36.9 (11.8) | 34.4 ± 10.3 |
| TH | 19.7 (9.5) | 218.7 (22.3) | 124.9 (28.9) | 58.9 (36.5) | 34.1 (16.4) | 41.6(15.2) | 48.1 (12.5) |
| TH+EV | 21.7 (10.9) | 224.8 (17.9) | 136.3 (16.5) | 61.7 (18.7) | 39.7 (18.2) | 45.3 (20.5) | 45.1 (12.2) |

BE, base excess; TH, therapeutic hypothermia; TH+EV, TH plus edaravone; NT, normothermia. **p* < 0.05, ***p* < 0.01, ****p* < 0.001 vs. NT, ##*p* < 0.01 vs. TH+EV
